# Supplementary figures and images for: Loss of the Birt–Hogg–Dubé tumor suppressor results in apoptotic resistance due to aberrant TGFβ-mediated transcription
Source: PubMed Central journal article supplement — Oncogene. 2011 Jan 24;30(22):2534–46. doi: 10.1038/onc.2010.628 (PMC3109270; doi:10.1038/onc.2010.628), 2011-01-24

# Cash\_Fig S1

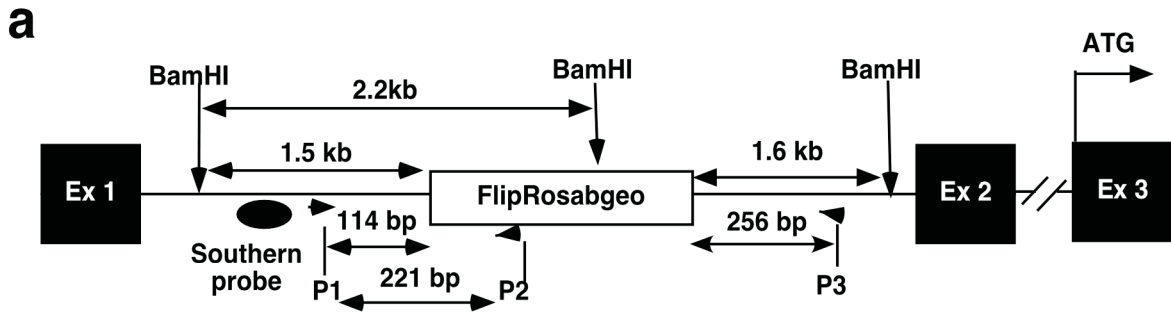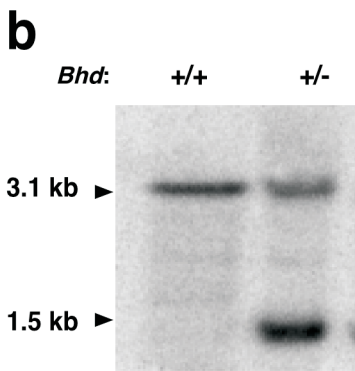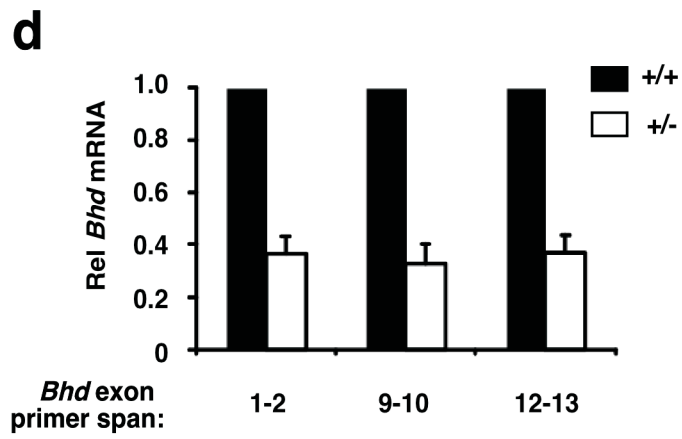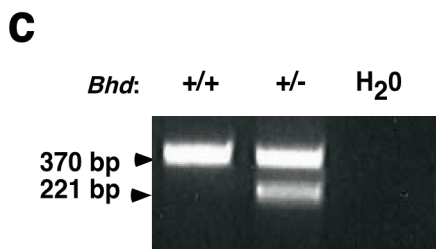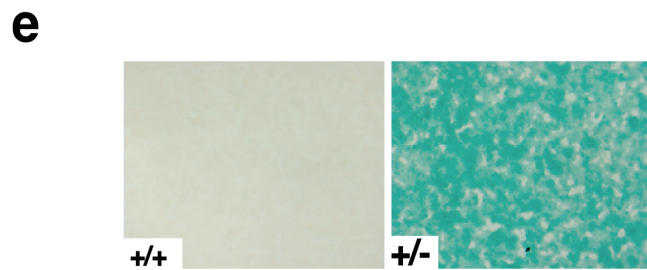

Supplement: onc2010628x1.pdf [file onc2010628x1.pdf]

# Cash\_Fig S4

**a**

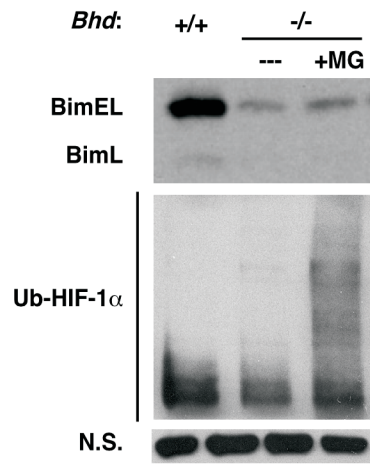

**b**

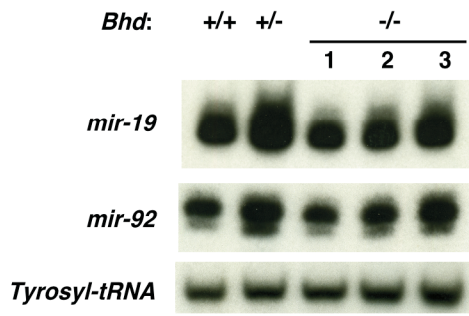

Supplement: onc2010628x4.pdf [file onc2010628x4.pdf]

# Cash\_Fig S5

**a**

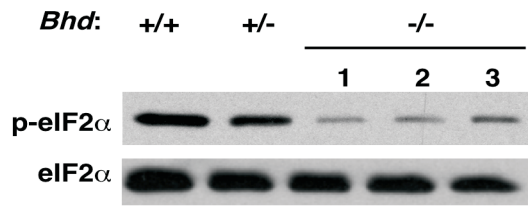

**b**

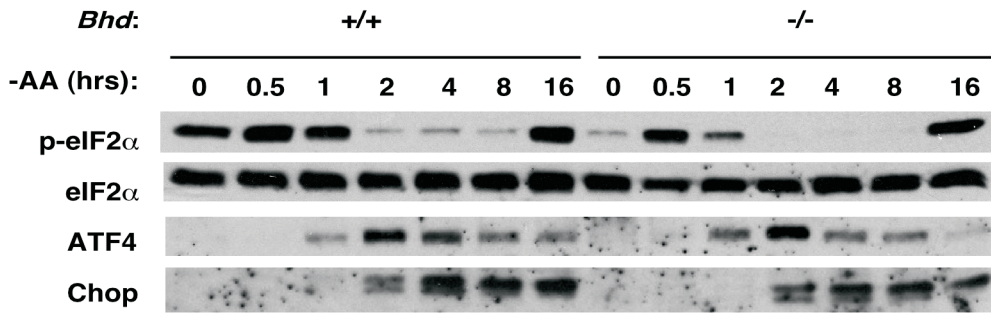

**c**

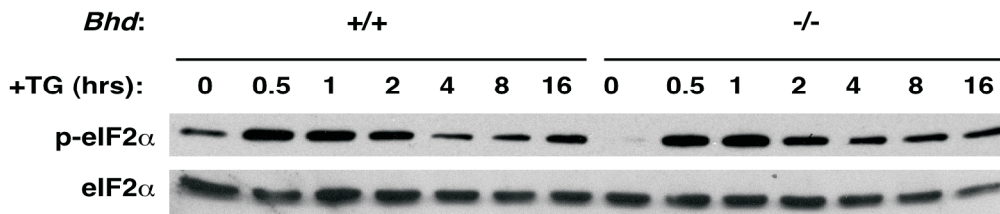

**d**

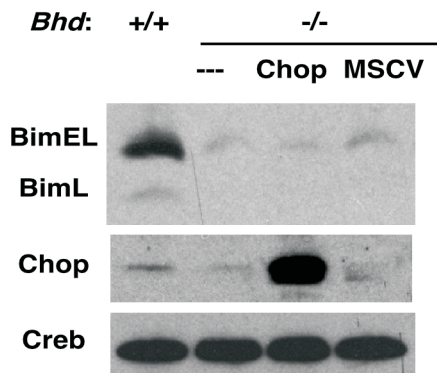

Supplement: onc2010628x5.pdf [file onc2010628x5.pdf]

# Cash\_Fig S6

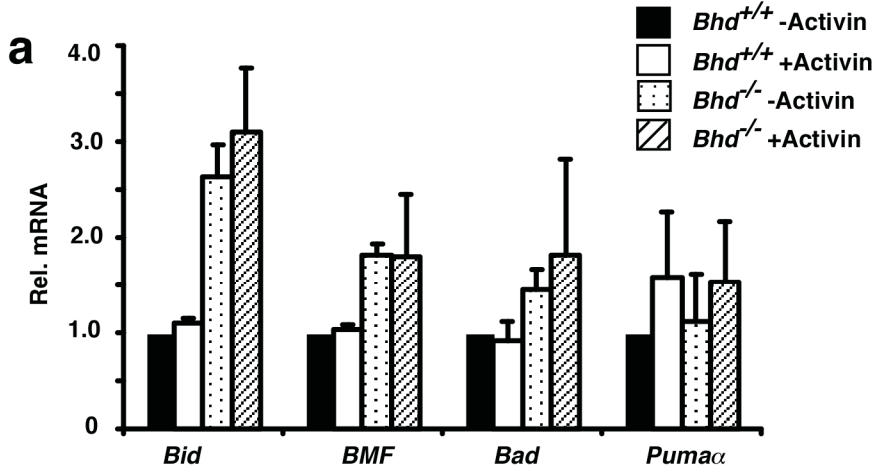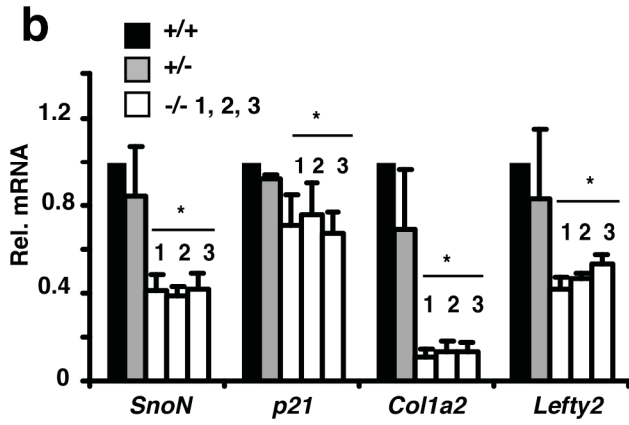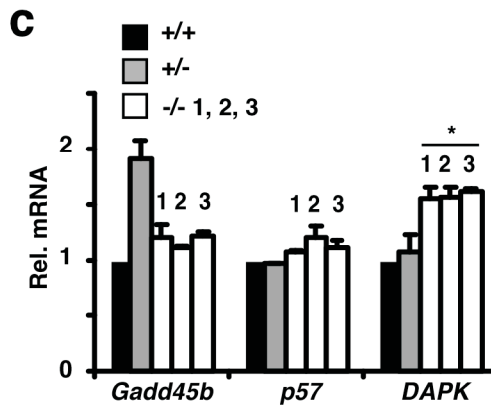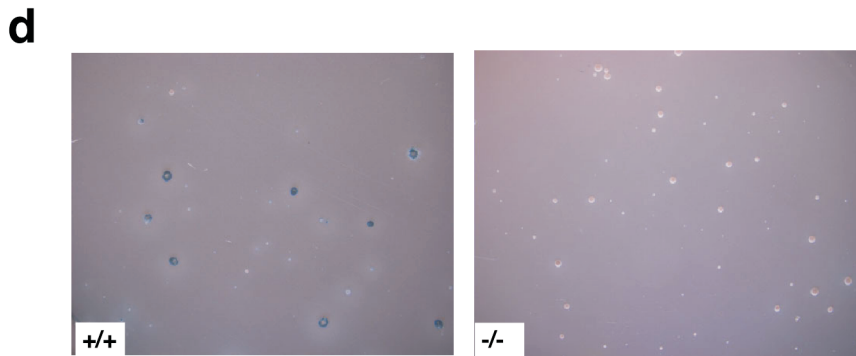

Supplement: onc2010628x6.pdf [file onc2010628x6.pdf]

# Cash\_Fig S7

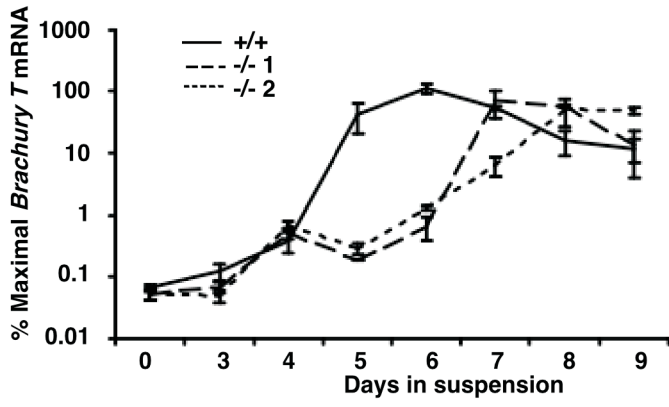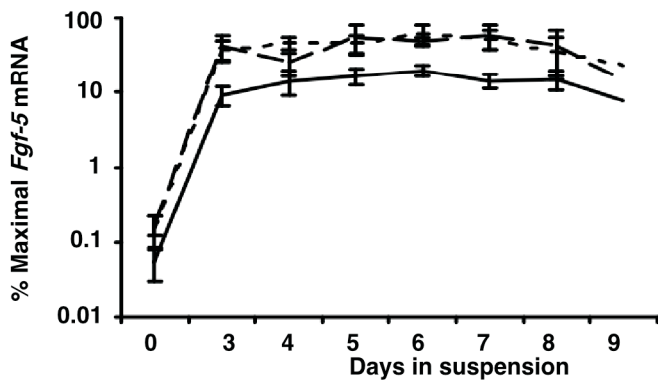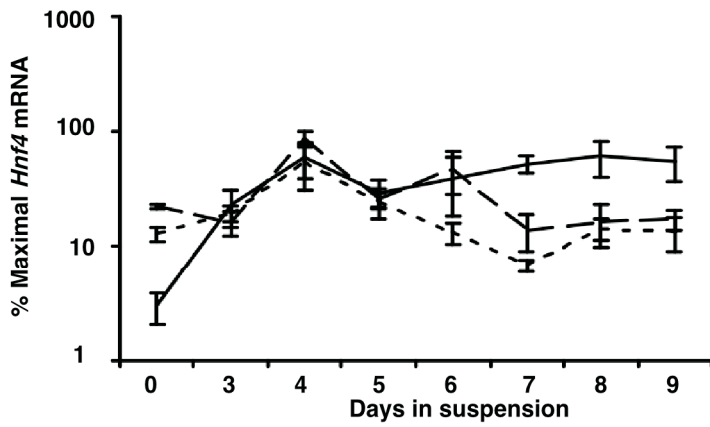

Supplement: onc2010628x7.pdf [file onc2010628x7.pdf]

# Cash\_Fig S8

**a**

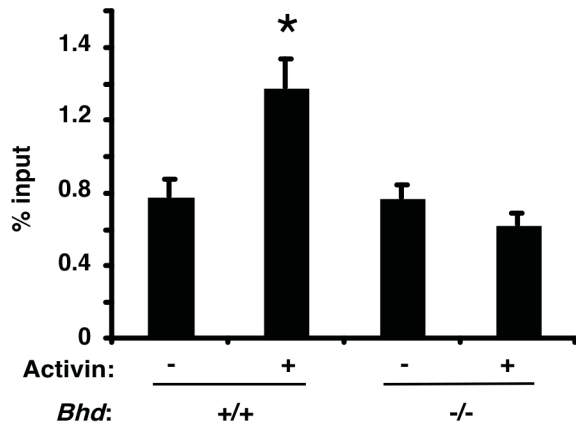

**b**

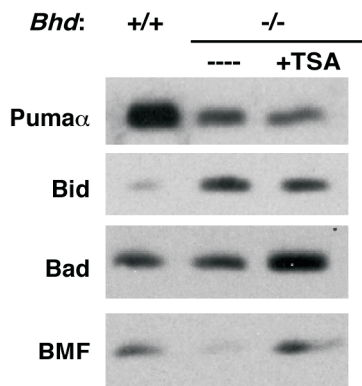

Supplement: onc2010628x8.pdf [file onc2010628x8.pdf]
